# Supplementary material
Source: publisher figshare collection journal article supplement (https://acs.figshare.com/ndownloader/files/3803239)
Supplement: Supplementary file 1 [file 3803239]

 
data_DAXX 
  
_audit_creation_method            SHELXL-97 
_chemical_name_systematic 
; 
 ? 
; 
_chemical_name_common             ? 
_chemical_melting_point           ? 
_chemical_formula_moiety          'C4 H2 N8 O4, C4 H2 N6 O4' 
_chemical_formula_sum 
 'C8 H4 N14 O8' 
_chemical_formula_weight          424.25 
  
loop_ 
 _atom_type_symbol 
 _atom_type_description 
 _atom_type_scat_dispersion_real 
 _atom_type_scat_dispersion_imag 
 _atom_type_scat_source 
 'C'  'C'   0.0181   0.0091 
 'International Tables Vol C Tables 4.2.6.8 and 6.1.1.4' 
 'H'  'H'   0.0000   0.0000 
 'International Tables Vol C Tables 4.2.6.8 and 6.1.1.4' 
 'N'  'N'   0.0311   0.0180 
 'International Tables Vol C Tables 4.2.6.8 and 6.1.1.4' 
 'O'  'O'   0.0492   0.0322 
 'International Tables Vol C Tables 4.2.6.8 and 6.1.1.4' 
  
_symmetry_cell_setting            monoclinic 
_symmetry_space_group_name_H-M    'P 2(1)/n' 
  
loop_ 
 _symmetry_equiv_pos_as_xyz 
 'x, y, z' 
 '-x+1/2, y+1/2, -z+1/2' 
 '-x, -y, -z' 
 'x-1/2, -y-1/2, z-1/2' 
  
_cell_length_a                    9.6986(2) 
_cell_length_b                    7.22470(10) 
_cell_length_c                    11.4627(8) 
_cell_angle_alpha                 90.00 
_cell_angle_beta                  111.793(8) 
_cell_angle_gamma                 90.00 
_cell_volume                      745.78(6) 
_cell_formula_units_Z             2 
_cell_measurement_temperature     85(2) 
_cell_measurement_reflns_used     9518 
_cell_measurement_theta_min       5.10 
_cell_measurement_theta_max       68.30 
  
_exptl_crystal_description        needle 
_exptl_crystal_colour             colorless 
_exptl_crystal_size_max           0.24 
_exptl_crystal_size_mid           0.06 
_exptl_crystal_size_min           0.01 
_exptl_crystal_density_meas       ? 
_exptl_crystal_density_diffrn     1.889 
_exptl_crystal_density_method     'not measured' 
_exptl_crystal_F_000              428 
_exptl_absorpt_coefficient_mu     1.495 
_exptl_absorpt_correction_type    multi-scan 
_exptl_absorpt_correction_T_min   0.7155 
_exptl_absorpt_correction_T_max   0.9852 
_exptl_absorpt_process_details 
; 
    Higashi, T. (1995). Program for Absorption Correction. 
    Rigaku Corporation, Tokyo, Japan. 
; 
  
_exptl_special_details 
; 
 4023 images x 1 sec / 8 sec @ 42.00 mm; 1.0 deg omega scans; 40kV/30mA 
; 
  
_diffrn_ambient_temperature       85(2) 
_diffrn_radiation_wavelength      1.54178 
_diffrn_radiation_type            CuK\a 
_diffrn_radiation_source          'micro-focus rotating anode' 
_diffrn_radiation_monochromator   confocal 
_diffrn_measurement_device_type   'Rigaku Saturn70 CCD' 
_diffrn_measurement_method        \w 
_diffrn_detector_area_resol_mean  29.257 
_diffrn_reflns_number             18793 
_diffrn_reflns_av_R_equivalents   0.0645 
_diffrn_reflns_av_sigmaI/netI     0.0294 
_diffrn_reflns_limit_h_min        -11 
_diffrn_reflns_limit_h_max        11 
_diffrn_reflns_limit_k_min        -8 
_diffrn_reflns_limit_k_max        8 
_diffrn_reflns_limit_l_min        -13 
_diffrn_reflns_limit_l_max        13 
_diffrn_reflns_theta_min          5.12 
_diffrn_reflns_theta_max          68.24 
_reflns_number_total              1367 
_reflns_number_gt                 1177 
_reflns_threshold_expression      >2sigma(I) 
  
_computing_data_collection        'CrystalClear-SM Expert 2.0 r12 (Rigaku, 2011)' 
_computing_cell_refinement        'CrystalClear-SM Expert 2.0 r12' 
_computing_data_reduction         'CrystalClear-SM Expert 2.0 r12' 
_computing_structure_solution     'SHELXS-97 (Sheldrick, 1990)' 
_computing_structure_refinement   'SHELXL-97 (Sheldrick, 1997)' 
_computing_molecular_graphics     'Bruker SHELXTL' 
_computing_publication_material   'Bruker SHELXTL' 
  
_refine_special_details 
; 
 Refinement of F^2^ against ALL reflections.  The weighted R-factor wR and 
 goodness of fit S are based on F^2^, conventional R-factors R are based 
 on F, with F set to zero for negative F^2^. The threshold expression of 
 F^2^ > 2sigma(F^2^) is used only for calculating R-factors(gt) etc. and is 
 not relevant to the choice of reflections for refinement.  R-factors based 
 on F^2^ are statistically about twice as large as those based on F, and R- 
 factors based on ALL data will be even larger. 
; 
  
_refine_ls_structure_factor_coef  Fsqd 
_refine_ls_matrix_type            full 
_refine_ls_weighting_scheme       calc 
_refine_ls_weighting_details 
 'calc w=1/[\s^2^(Fo^2^)+(0.0185P)^2^+1.1662P] where P=(Fo^2^+2Fc^2^)/3' 
_atom_sites_solution_primary      direct 
_atom_sites_solution_secondary    difmap 
_atom_sites_solution_hydrogens    difmap 
_refine_ls_hydrogen_treatment     refall 
_refine_ls_extinction_method      SHELXL 
_refine_ls_extinction_coef        0.0050(5) 
_refine_ls_extinction_expression 
 'Fc^*^=kFc[1+0.001xFc^2^\l^3^/sin(2\q)]^-1/4^' 
_refine_ls_number_reflns          1367 
_refine_ls_number_parameters      145 
_refine_ls_number_restraints      0 
_refine_ls_R_factor_all           0.0496 
_refine_ls_R_factor_gt            0.0434 
_refine_ls_wR_factor_ref          0.0963 
_refine_ls_wR_factor_gt           0.0907 
_refine_ls_goodness_of_fit_ref    1.198 
_refine_ls_restrained_S_all       1.198 
_refine_ls_shift/su_max           0.000 
_refine_ls_shift/su_mean          0.000 
  
loop_ 
 _atom_site_label 
 _atom_site_type_symbol 
 _atom_site_fract_x 
 _atom_site_fract_y 
 _atom_site_fract_z 
 _atom_site_U_iso_or_equiv 
 _atom_site_adp_type 
 _atom_site_occupancy 
 _atom_site_symmetry_multiplicity 
 _atom_site_calc_flag 
 _atom_site_refinement_flags 
 _atom_site_disorder_assembly 
 _atom_site_disorder_group 
O1 O 0.66370(18) 0.0987(2) 0.25405(14) 0.0214(4) Uani 1 1 d . . . 
O2 O 0.65923(18) 0.0576(2) 0.06376(15) 0.0215(4) Uani 1 1 d . . . 
O3 O 0.37031(18) 0.9552(2) 0.20192(13) 0.0173(4) Uani 1 1 d . . . 
O4 O 0.32054(16) 1.1359(2) 0.33322(14) 0.0160(4) Uani 1 1 d . . . 
N1 N 0.6340(2) 0.1484(3) 0.14434(17) 0.0152(4) Uani 1 1 d . . . 
N2 N 0.53628(19) 0.4296(3) 0.18942(16) 0.0135(4) Uani 1 1 d . . . 
N3 N 0.4796(2) 0.5889(3) 0.13046(17) 0.0138(4) Uani 1 1 d . . . 
H3 H 0.444(3) 0.681(5) 0.170(3) 0.030(8) Uiso 1 1 d . . . 
N4 N 0.35742(19) 0.9873(3) 0.30276(16) 0.0127(4) Uani 1 1 d . . . 
N5 N 0.34738(19) 0.8468(3) 0.48983(16) 0.0131(4) Uani 1 1 d . . . 
N6 N 0.39753(19) 0.6832(3) 0.54541(16) 0.0120(4) Uani 1 1 d . . . 
H6 H 0.393(3) 0.657(4) 0.618(3) 0.024(7) Uiso 1 1 d . . . 
N7 N 0.46249(19) 0.6846(3) 0.38090(16) 0.0123(4) Uani 1 1 d . . . 
C1 C 0.5659(2) 0.3249(3) 0.10681(19) 0.0127(4) Uani 1 1 d . . . 
C2 C 0.5277(2) 0.4159(3) -0.0093(2) 0.0123(4) Uani 1 1 d . . . 
C3 C 0.3894(2) 0.8370(3) 0.39274(19) 0.0120(4) Uani 1 1 d . . . 
C4 C 0.4660(2) 0.5896(3) 0.48108(18) 0.0116(4) Uani 1 1 d . . . 
  
loop_ 
 _atom_site_aniso_label 
 _atom_site_aniso_U_11 
 _atom_site_aniso_U_22 
 _atom_site_aniso_U_33 
 _atom_site_aniso_U_23 
 _atom_site_aniso_U_13 
 _atom_site_aniso_U_12 
O1 0.0259(9) 0.0261(10) 0.0150(8) 0.0080(7) 0.0107(7) 0.0099(7) 
O2 0.0259(9) 0.0237(9) 0.0170(8) -0.0009(7) 0.0104(7) 0.0078(7) 
O3 0.0241(8) 0.0189(9) 0.0103(7) 0.0014(6) 0.0078(6) -0.0007(7) 
O4 0.0160(8) 0.0141(8) 0.0155(7) 0.0001(6) 0.0033(6) 0.0033(6) 
N1 0.0144(9) 0.0180(10) 0.0138(9) 0.0008(8) 0.0059(7) 0.0019(7) 
N2 0.0119(8) 0.0160(10) 0.0137(9) 0.0001(7) 0.0059(7) 0.0002(7) 
N3 0.0167(9) 0.0155(10) 0.0113(9) 0.0004(7) 0.0074(7) 0.0021(7) 
N4 0.0128(8) 0.0136(10) 0.0107(8) 0.0013(7) 0.0031(7) 0.0003(7) 
N5 0.0132(8) 0.0139(9) 0.0114(8) 0.0012(7) 0.0037(7) 0.0013(7) 
N6 0.0156(9) 0.0111(9) 0.0097(8) 0.0025(7) 0.0050(7) -0.0002(7) 
N7 0.0125(8) 0.0132(9) 0.0107(8) -0.0015(7) 0.0034(7) -0.0010(7) 
C1 0.0111(9) 0.0162(11) 0.0119(10) 0.0001(8) 0.0057(8) 0.0007(8) 
C2 0.0117(10) 0.0140(11) 0.0124(10) -0.0019(8) 0.0059(8) -0.0005(8) 
C3 0.0119(9) 0.0133(11) 0.0101(9) 0.0013(8) 0.0031(8) -0.0002(8) 
C4 0.0099(9) 0.0143(11) 0.0090(9) -0.0019(8) 0.0019(8) -0.0021(8) 
  
_geom_special_details 
; 
 All esds (except the esd in the dihedral angle between two l.s. planes) 
 are estimated using the full covariance matrix.  The cell esds are taken 
 into account individually in the estimation of esds in distances, angles 
 and torsion angles; correlations between esds in cell parameters are only 
 used when they are defined by crystal symmetry.  An approximate (isotropic) 
 treatment of cell esds is used for estimating esds involving l.s. planes. 
; 
  
loop_ 
 _geom_bond_atom_site_label_1 
 _geom_bond_atom_site_label_2 
 _geom_bond_distance 
 _geom_bond_site_symmetry_2 
 _geom_bond_publ_flag 
O1 N1 1.235(2) . ? 
O2 N1 1.229(3) . ? 
O3 N4 1.230(2) . ? 
O4 N4 1.223(2) . ? 
N1 C1 1.427(3) . ? 
N2 C1 1.324(3) . ? 
N2 N3 1.345(3) . ? 
N3 C2 1.365(3) 3_665 ? 
N3 H3 0.94(3) . ? 
N4 C3 1.449(3) . ? 
N5 C3 1.321(3) . ? 
N5 N6 1.345(3) . ? 
N6 C4 1.344(3) . ? 
N6 H6 0.87(3) . ? 
N7 C4 1.327(3) . ? 
N7 C3 1.344(3) . ? 
C1 C2 1.405(3) . ? 
C2 N3 1.365(3) 3_665 ? 
C2 C2 1.377(4) 3_665 ? 
C4 C4 1.445(4) 3_666 ? 
  
loop_ 
 _geom_angle_atom_site_label_1 
 _geom_angle_atom_site_label_2 
 _geom_angle_atom_site_label_3 
 _geom_angle 
 _geom_angle_site_symmetry_1 
 _geom_angle_site_symmetry_3 
 _geom_angle_publ_flag 
O2 N1 O1 125.0(2) . . ? 
O2 N1 C1 116.71(18) . . ? 
O1 N1 C1 118.28(18) . . ? 
C1 N2 N3 106.63(17) . . ? 
N2 N3 C2 110.31(18) . 3_665 ? 
N2 N3 H3 121.1(19) . . ? 
C2 N3 H3 128.4(19) 3_665 . ? 
O4 N4 O3 125.19(18) . . ? 
O4 N4 C3 117.54(17) . . ? 
O3 N4 C3 117.27(18) . . ? 
C3 N5 N6 100.45(17) . . ? 
C4 N6 N5 110.35(17) . . ? 
C4 N6 H6 129(2) . . ? 
N5 N6 H6 121(2) . . ? 
C4 N7 C3 100.45(17) . . ? 
N2 C1 C2 111.04(19) . . ? 
N2 C1 N1 119.58(18) . . ? 
C2 C1 N1 129.32(19) . . ? 
N3 C2 C2 107.7(2) 3_665 3_665 ? 
N3 C2 C1 148.0(2) 3_665 . ? 
C2 C2 C1 104.4(2) 3_665 . ? 
N5 C3 N7 117.92(19) . . ? 
N5 C3 N4 120.53(19) . . ? 
N7 C3 N4 121.55(18) . . ? 
N7 C4 N6 110.82(19) . . ? 
N7 C4 C4 125.8(2) . 3_666 ? 
N6 C4 C4 123.4(2) . 3_666 ? 
  
loop_ 
 _geom_torsion_atom_site_label_1 
 _geom_torsion_atom_site_label_2 
 _geom_torsion_atom_site_label_3 
 _geom_torsion_atom_site_label_4 
 _geom_torsion 
 _geom_torsion_site_symmetry_1 
 _geom_torsion_site_symmetry_2 
 _geom_torsion_site_symmetry_3 
 _geom_torsion_site_symmetry_4 
 _geom_torsion_publ_flag 
C1 N2 N3 C2 0.5(2) . . . 3_665 ? 
C3 N5 N6 C4 0.8(2) . . . . ? 
N3 N2 C1 C2 -0.3(2) . . . . ? 
N3 N2 C1 N1 177.26(18) . . . . ? 
O2 N1 C1 N2 -179.85(19) . . . . ? 
O1 N1 C1 N2 -0.2(3) . . . . ? 
O2 N1 C1 C2 -2.8(3) . . . . ? 
O1 N1 C1 C2 176.9(2) . . . . ? 
N2 C1 C2 N3 -179.5(3) . . . 3_665 ? 
N1 C1 C2 N3 3.3(5) . . . 3_665 ? 
N2 C1 C2 C2 0.0(3) . . . 3_665 ? 
N1 C1 C2 C2 -177.3(2) . . . 3_665 ? 
N6 N5 C3 N7 -0.6(2) . . . . ? 
N6 N5 C3 N4 179.68(17) . . . . ? 
C4 N7 C3 N5 0.1(2) . . . . ? 
C4 N7 C3 N4 179.87(18) . . . . ? 
O4 N4 C3 N5 15.3(3) . . . . ? 
O3 N4 C3 N5 -165.00(19) . . . . ? 
O4 N4 C3 N7 -164.39(18) . . . . ? 
O3 N4 C3 N7 15.3(3) . . . . ? 
C3 N7 C4 N6 0.4(2) . . . . ? 
C3 N7 C4 C4 -179.2(3) . . . 3_666 ? 
N5 N6 C4 N7 -0.8(2) . . . . ? 
N5 N6 C4 C4 178.8(2) . . . 3_666 ? 
  
loop_ 
 _geom_hbond_atom_site_label_D 
 _geom_hbond_atom_site_label_H 
 _geom_hbond_atom_site_label_A 
 _geom_hbond_distance_DH 
 _geom_hbond_distance_HA 
 _geom_hbond_distance_DA 
 _geom_hbond_angle_DHA 
 _geom_hbond_site_symmetry_A 
N3 H3 O3  0.94(3) 2.18(3) 3.073(3) 157(3) . 
N6 H6 N2  0.87(3) 2.14(3) 2.978(3) 160(3) 3_666 
  
_diffrn_measured_fraction_theta_max    1.000 
_diffrn_reflns_theta_full              68.24 
_diffrn_measured_fraction_theta_full   1.000 
_refine_diff_density_max    0.373 
_refine_diff_density_min   -0.347 
_refine_diff_density_rms    0.083 
